# Supplementary material for: Observations on the spawning behavior, egg masses and paralarval development of the ommastrephid squid Todarodes pacificus in a laboratory mesocosm
Source: Oxford University Press journal article supplement (doi:10.1242/jeb.127670), 2015-12-01
Supplement: jeb127670supp.pdf [file jeb127670supp.pdf]

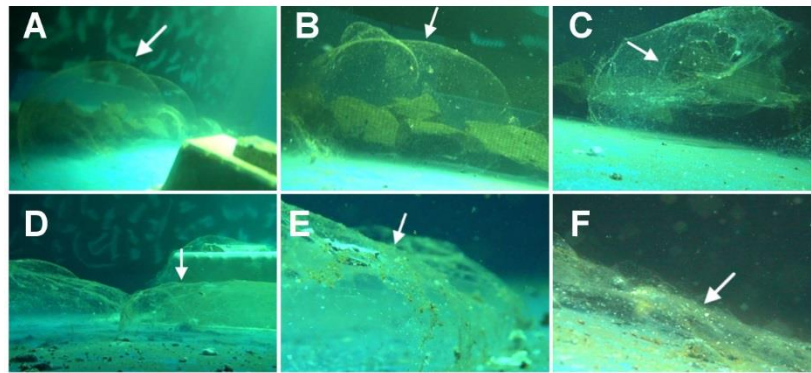

**Fig. S1. Time series of the fate of egg masses that settled on the bottom of the tank.** Arrows indicate the border of the egg masses. (A) Day 1; egg mass is nearly spherical (B) Day 2; egg mass collapses and is ellipsoid (C) Day 3; egg mass collapses further and the nidamental gland jelly layer is damaged (D) Day 4; collapsed egg mass is almost flattened (E) Day 5; enlarged view of the egg mass surface showing infection (F) Day 6; egg mass has completely disintegrated and dead embryos are trapped within jelly on the floor of the tank.

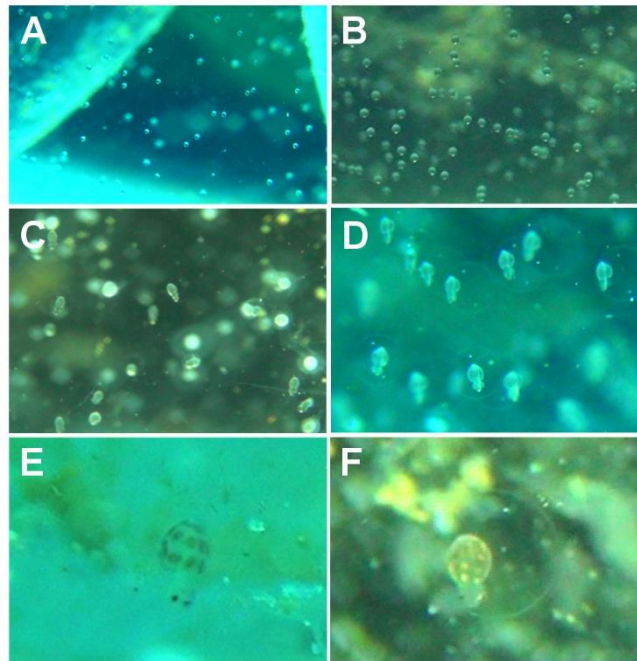

**Fig. S2. Time series of embryonic development within egg mass inside the chorion.** (A) Day 1; fertilized eggs. Egg diameter, 0.88 mm (B) Day 2; spherical embryos with expanded chorion (C) Day 3; embryos have a mantle, eye, arms and proboscis nearly developed. Embryo length, 0.9 mm (D) Day 4; embryos have a developed mantle, pigmented eyes, and the chorion has increased in diameter, 1 mm (E-F) Day 5 & 6 respectively; the advanced embryo is capable of movement by active mantle contraction inside the chorion, within the egg mass and the chromatophores are well developed. Embryo length, 1 – 1.2 mm.
